# Supplementary material for: Physico-chemical studies of resveratrol, methyl-jasmonate and cyclodextrin interactions: an approach to resveratrol bioproduction optimization
Source: PubMed Central journal article supplement (PMC9128506; doi:10.1039/c7ra11619e), 2018-01-04
Supplement: RA-008-C7RA11619E-s001.pdf [file RA-008-C7RA11619E-s001.pdf]

## Physico chemical studies of resveratrol, methyl-jasmonate and cyclodextrins interactions: an approach to resveratrol bioproduction optimization

E. Oliva<sup>a,b,e</sup>, D. Mathiron<sup>b,e</sup>, E. Bertaut<sup>c,e</sup>, D. Landy<sup>c,e</sup>, D. Cailleu<sup>b,e</sup>, S. Pilard<sup>b,e</sup>, C. Clément<sup>d,e</sup>, E. Courot<sup>d,e</sup>, V. Bonnet<sup>a,e</sup> and F. Djedaïni-Pilard<sup>a,e\*</sup>

<sup>a.</sup> *Laboratoire de Glycochimie des Antimicrobiens et des Agroressources UMR 7378 CNRS, Université de Picardie Jules Verne, 33 rue Saint-Leu, 80039 Amiens, France.*

<sup>b.</sup> *Plateforme-analytique, Université de Picardie Jules Verne, 33 rue Saint-Leu, 80039 Amiens, France.*

<sup>c.</sup> *Unité de Chimie Environnementale et Interactions sur le Vivant (UCEIV, EA 4492), ULCO, F-59140 Dunkerque, France.*

<sup>d.</sup> *URVVC EA 4707, Université de Reims Champagne-Ardenne, Moulin de la Housse, 51687 Reims, France.*

<sup>e.</sup> *SFR Condorcet "Agrosociences Environnement et Développement Durable" FR CNRS 3417, UFR Sciences Exactes et Naturelles, BP 1039 Moulin de la Housse - Bâtiment 18 - 51687 Reims Cedex 02, France.*

### Supplementary Information

Figure S1: ESI (+) MS Spectra corresponding to RSV with maltoheptaose (a) and RSV with  $\beta$ -CD (b) in the same experimental conditions.

Figure S2: dedicated Job plots of (a)  $\beta$ -CD (up)/resveratrol (down) and (b) DIMEB (up)/resveratrol (down)

Figure S3: Plot of the relative intensity of each complex between CD and MeJA versus cone voltage.

Figure S4: Fit between experimental RSV solubility data ( $\beta$ -CD ■, and RAMEB ×) and theoretical values predicted by formation constants obtained by ITC (red line and blue line, respectively).

Figure S5: Fit between experimental MEJA solubility data ( $\beta$ -CD ■, and RAMEB ×) and theoretical values predicted by formation constants obtained by ITC (red line and blue line, respectively).

Table SI : Association constant values,  $K$  ( $M^{-1}$ ) calculated from solubility data

Figure S6: Enlarged contour plot of a T-ROESY experiment (spin lock: 300 ms, 22 dB) performed at 600 MHz on a  $\beta$ -CD/RSV/MeJA mixture (4.6 mM of  $\beta$ -CD with RSV and MeJA at saturation in  $D_2O$ ). Rectangles represent the absence of a correlation between RSV and MeJA and ovals the presence of correlations between  $\beta$ -CD/RSV on one hand and  $\beta$ -CD/MeJA on the other hand

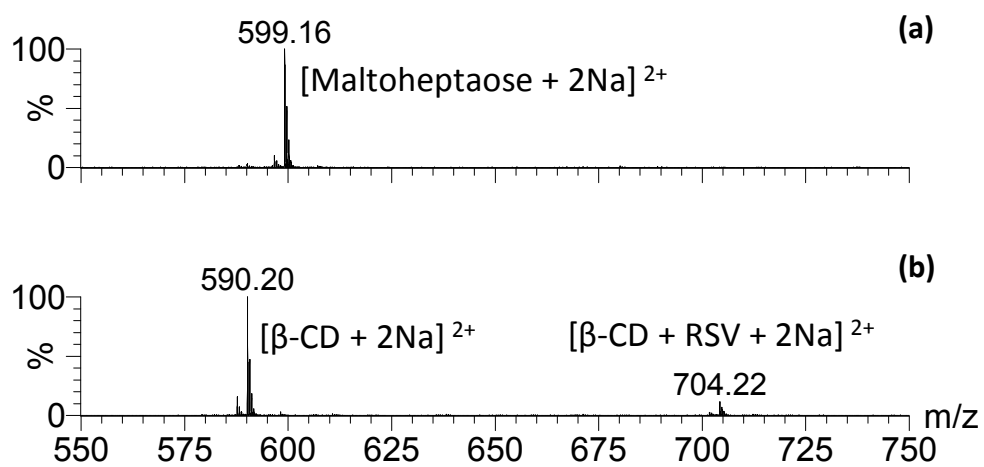

Figure S1: ESI (+) MS Spectra corresponding to RSV with maltoheptaose (a) and RSV with  $\beta$ -CD (b) in the same experimental conditions.

a

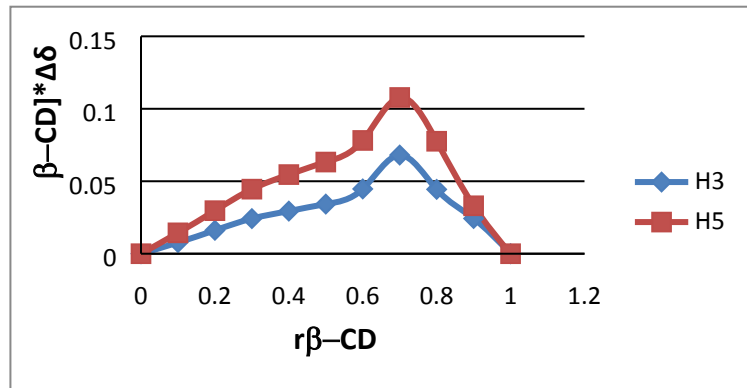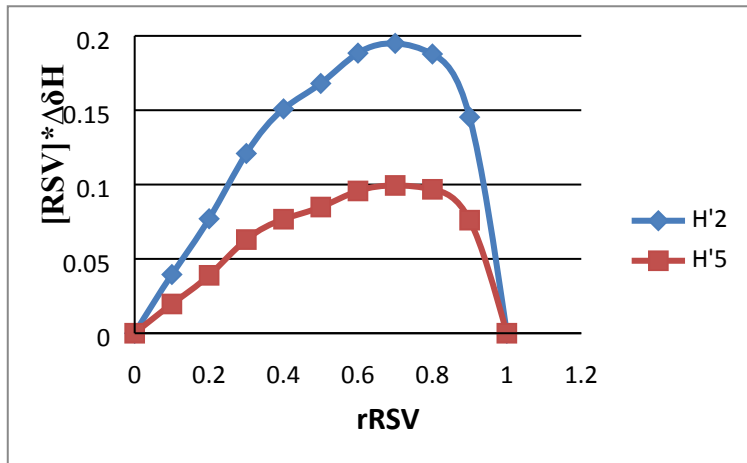

b

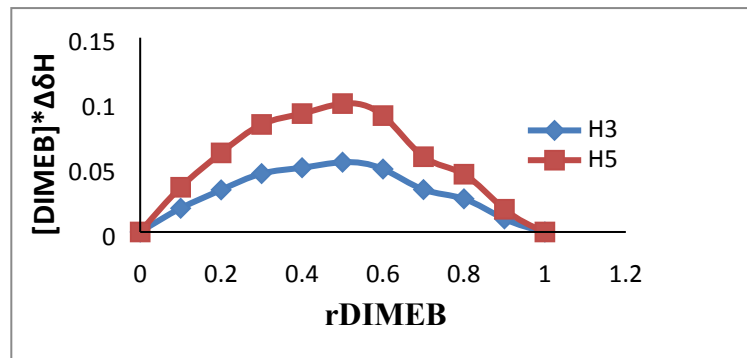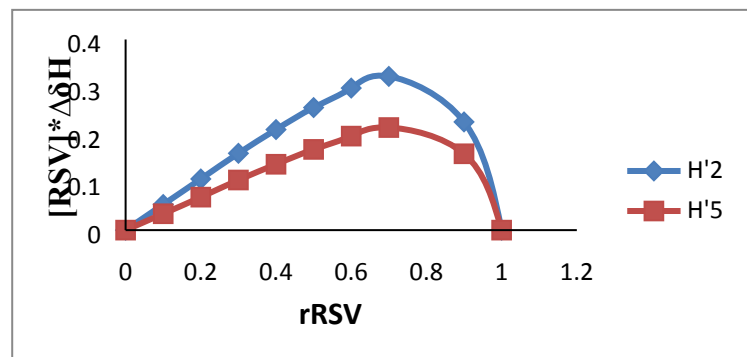

Figure S2: dedicated Job plots of (a)  $\beta$ -CD (up)/resveratrol (down) and (b) DIMEB (up)/resveratrol (down)

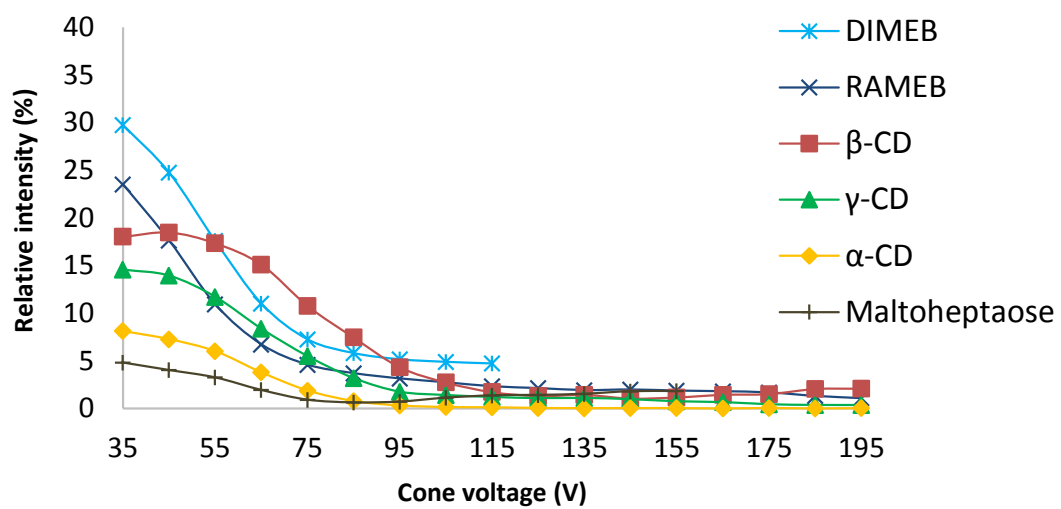

Figure S3: Plot of the relative intensity of each complex between CD and MeJA versus cone voltage.

The solubility of a guest G in the presence of CD (leading to a CD-G complex with a formation constant K), can be calculated as follows:

$$[G]_T = [G] + [CD-G] \quad (1)$$

$$[CD]_T = [CD] + [CD-G] \quad (2)$$

$$K = [CD-G] / ([CD] * [G]) \quad (3)$$

Combining equation (3) with equation (2):

$$[CD-G] = K * ([CD]_T - [CD-G]) * [G] \quad (4)$$

In phase solubility experiments, [G] is equal to the intrinsic G solubility  $S_0$ , thus:

$$[CD-G] = (K * [CD]_T * S_0) / (1 + K * S_0) \quad (5)$$

As a result, the total guest concentration (ie. its solubility in the presence of CD) is equal to:

$$[G]_T = [G] + [CD-G] = S_0 + (K * [CD]_T * S_0) / (1 + K * S_0) \quad (6)$$

Accordingly, formation constants obtained by ITC were used to simulate the RSV and MEJA solubility in the presence of  $\beta$ -CD and RAMEB. Least square fitting between experimental and theoretical data were then realized (Figure S4 and S5, for RSV and MEJA, respectively), with a floating value for the intrinsic guest solubility.

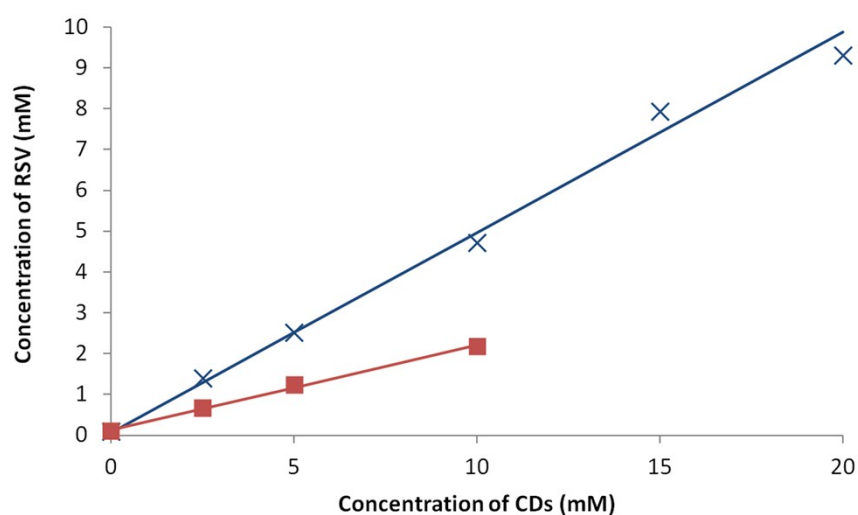

Figure S4: Fit between experimental RSV solubility data ( $\beta$ -CD ■ and RAMEB ×) and theoretical values predicted by formation constants obtained by ITC (red line and blue line, respectively).

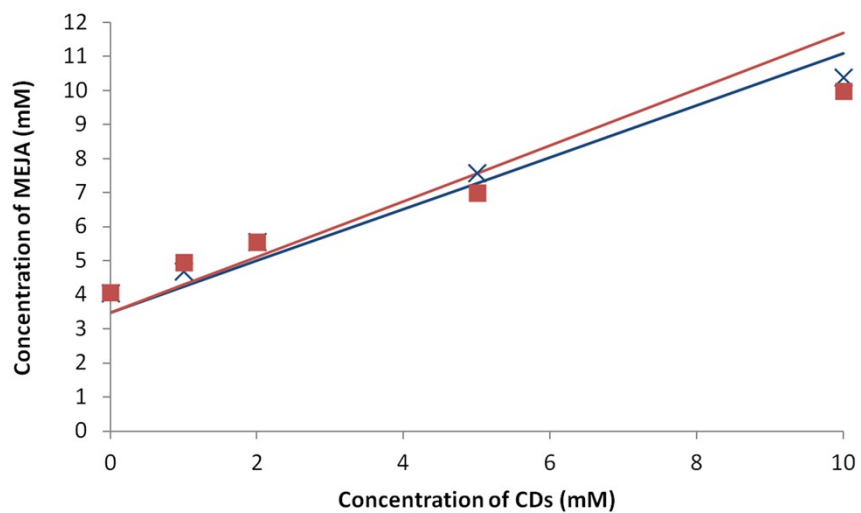

Figure S5: Fit between experimental MeJA solubility data ( $\beta$ -CD ■ and RAMEB ×) and theoretical values predicted by formation constants obtained by ITC (red line and blue line, respectively).

|             | RSV    | MeJA |
|-------------|--------|------|
| $\beta$ -CD | 3 053  | 481  |
| RAMEB       | 10 700 | 570  |

Table SI : Association constant values,  $K$  ( $M^{-1}$ ) calculated from solubility data

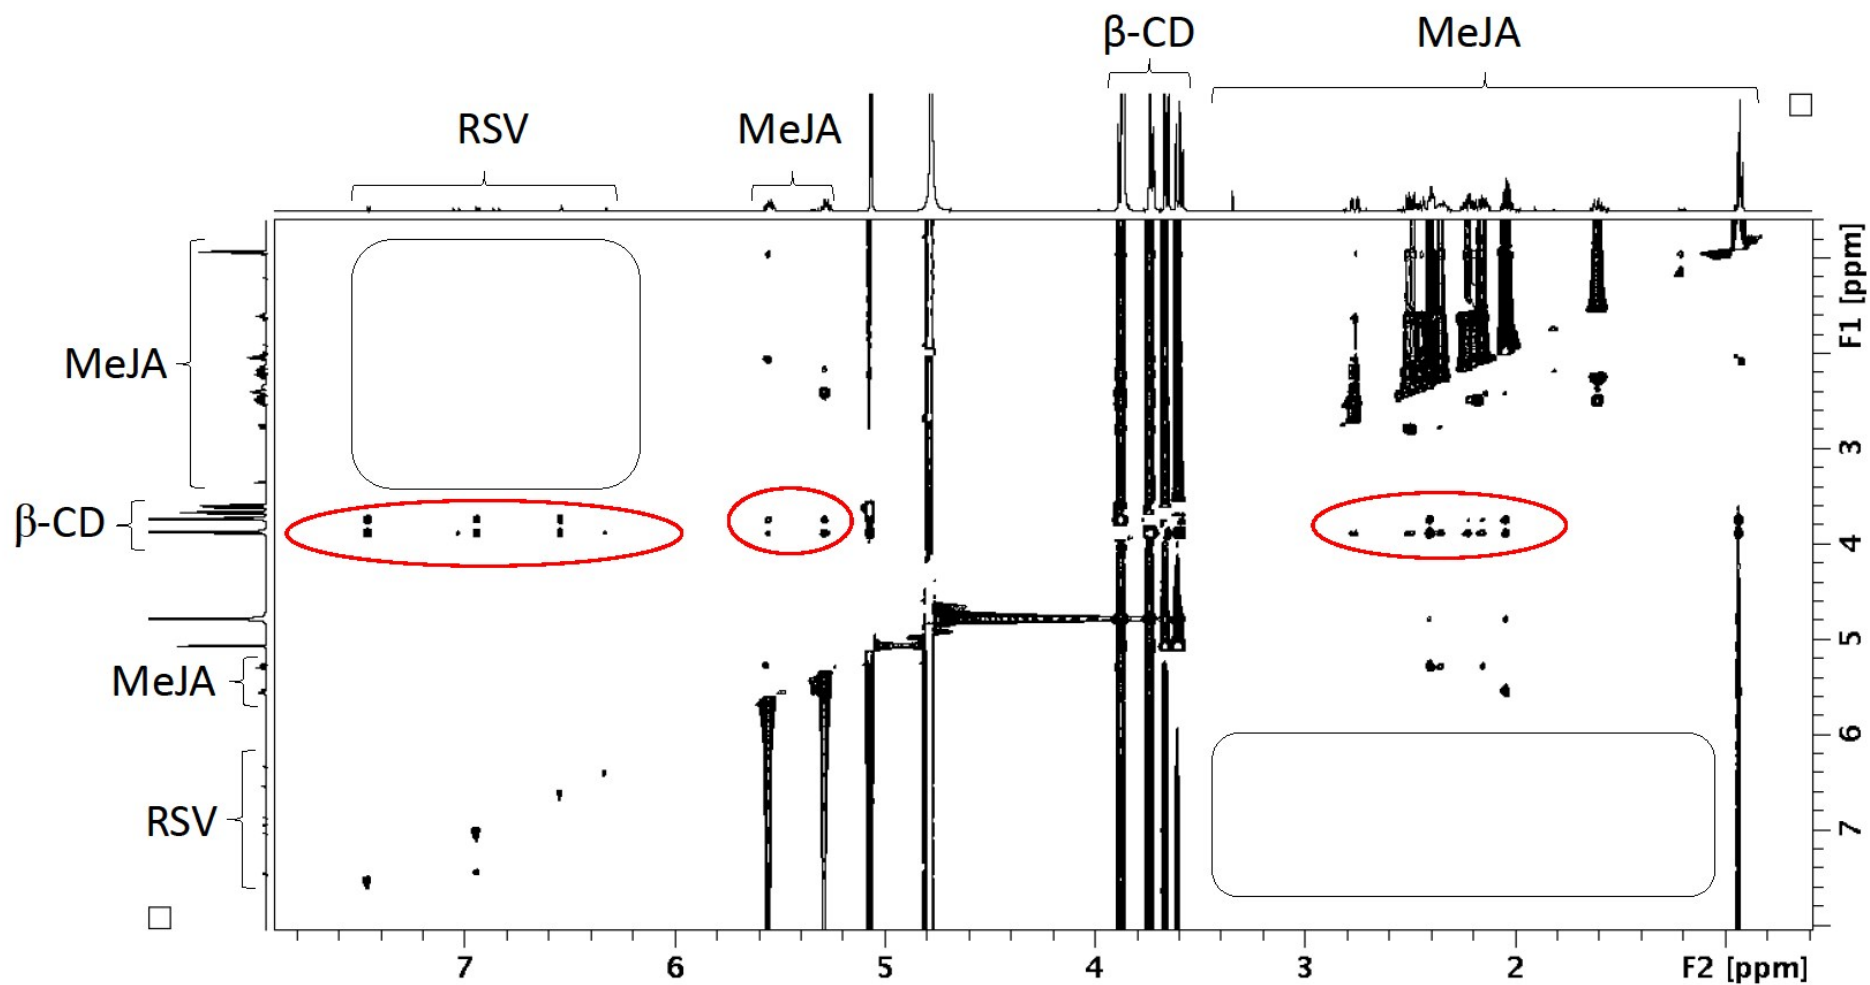

Figure S6: Enlarged contour plot of a T-ROESY experiment (spin lock: 300 ms, 22 dB) performed at 600 MHz on a  $\beta$ -CD/RSV/MeJA mixture (4.6 mM of  $\beta$ -CD with RSV and MeJA at saturation in  $D_2O$ ). Rectangles represent the absence of a correlation between RSV and MeJA and ovals the presence of correlations between  $\beta$ -CD/ RSV on one hand and  $\beta$ -CD/MeJA on the other hand
